# Supplementary material for: Zn tolerance in the evergreen shrub, Aucuba japonica, naturally growing at a mine site: Cell wall immobilization, aucubin production, and Zn adsorption on fungal mycelia
Source: PubMed Central journal article supplement (PMC8483361; doi:10.1371/journal.pone.0257690), 2021-09-30
Supplement: pone.0257690.s002.pdf [file pone.0257690.s002.pdf]

**(A) Data set for aucubin and citric acid concentrations in *A. japonica* roots.**

| July 2017            |      |      |      |      |      |      |      |      |      |      |
|----------------------|------|------|------|------|------|------|------|------|------|------|
| Detoxicant (mg/g FW) | 1    | 2    | 3    | 4    | 5    | 6    | 7    | 8    | 9    | 10   |
| Aucubin              | 19.2 | 30.2 | 19.8 | 23.2 | 24.8 | 21.7 | 26.4 | 22.0 | 22.7 | 18.4 |
| Citric acid          | 1.2  | 0.9  | 0.9  | 0.3  | 0.7  | 0.4  | 0.9  | 0.7  | 0.6  | 1.2  |

  

| January 2018         |      |      |      |      |      |      |      |      |      |      |
|----------------------|------|------|------|------|------|------|------|------|------|------|
| Detoxicant (mg/g FW) | 1    | 2    | 3    | 4    | 5    | 6    | 7    | 8    | 9    | 10   |
| Aucubin              | 14.3 | 28.9 | 19.9 | 18.8 | 16.1 | 17.8 | 23.3 | 18.2 | 27.2 | 13.8 |
| Citric acid          | 1.1  | 0.9  | 1.0  | 1.4  | 1.6  | 1.4  | 1.8  | 1.2  | 1.5  | 1.2  |

The numbers from 1 to 10 indicate the replications of *A. japonica*.

**(B) Data set for Table 1: AM fungi and root endophytes infection rates.**

July 2016

| Replications | AM fungi (%)      |                  |         |        | Root endophytic fungi (%) |        |
|--------------|-------------------|------------------|---------|--------|---------------------------|--------|
|              | <i>Paris</i> type | <i>Arum</i> type | Vesicle | Hyphae | Microsclerotia            | Hyphae |
| 1            | 54.7              | 1.3              | 17.3    | 56.0   | 8.0                       | 34.0   |
| 2            | 74.0              | 0.0              | 24.7    | 78.0   | 6.0                       | 16.7   |
| 3            | 72.7              | 0.0              | 2.0     | 50.7   | 22.7                      | 82.7   |
| 4            | 47.3              | 0.7              | 6.0     | 46.0   | 35.3                      | 48.7   |
| 5            | 81.3              | 0.0              | 16.0    | 66.7   | 23.3                      | 39.3   |
| 6            | 40.0              | 0.0              | 33.3    | 46.7   | 40.0                      | 38.0   |
| 7            | 64.7              | 0.7              | 25.3    | 42.7   | 19.3                      | 59.3   |
| 8            | 45.3              | 0.7              | 16.0    | 26.7   | 17.3                      | 23.3   |
| 9            | 85.3              | 4.7              | 15.3    | 88.7   | 8.7                       | 47.3   |
| 10           | 73.3              | 0.0              | 4.0     | 80.0   | 16.0                      | 78.7   |

January 2107

| Replications | Root endophytic fungi (%) |                  |         |        | Root endophytic fungi (%) |        |
|--------------|---------------------------|------------------|---------|--------|---------------------------|--------|
|              | <i>Paris</i> type         | <i>Arum</i> type | Vesicle | Hyphae | Microsclerotia            | Hyphae |
| 1            | 56.0                      | 1.3              | 10.0    | 49.3   | 10.7                      | 48.7   |
| 2            | 71.3                      | 0.0              | 22.7    | 66.7   | 18.0                      | 43.3   |
| 3            | 59.3                      | 0.0              | 4.7     | 53.3   | 28.7                      | 81.3   |
| 4            | 72.0                      | 0.0              | 22.7    | 77.3   | 16.0                      | 30.0   |
| 5            | 68.0                      | 0.0              | 16.0    | 76.7   | 28.0                      | 66.0   |
| 6            | 71.3                      | 0.0              | 8.0     | 74.0   | 33.3                      | 79.3   |
| 7            | 69.3                      | 0.0              | 7.3     | 66.7   | 25.3                      | 58.7   |
| 8            | 81.3                      | 0.0              | 13.3    | 90.7   | 19.3                      | 60.7   |
| 9            | 87.3                      | 0.0              | 9.3     | 45.3   | 15.3                      | 66.0   |
| 10           | 46.7                      | 0.0              | 2.0     | 45.3   | 8.7                       | 26.7   |

The numbers from 1 to 10 indicate the replications of *A. japonica*.

**(C) Data set for S1 Table: Properties of root-zone soil.**

| Properties              | 1     | 2     | 3      | 4     | 5     | 6     | 7      | 8     | 9     | 10    |
|-------------------------|-------|-------|--------|-------|-------|-------|--------|-------|-------|-------|
| Total Cd (mg/kg)        | 3.0   | 3.1   | 3.6    | 3.3   | 3.4   | 2.5   | 3.4    | 3.3   | 3.3   | 2.8   |
| Total Cu (mg/kg)        | 366.6 | 368.0 | 284.3  | 323.9 | 364.6 | 284.2 | 385.5  | 368.3 | 317.5 | 393.2 |
| Total Mn (mg/kg)        | 586.1 | 952.2 | 2253.6 | 826.3 | 648.3 | 604.8 | 1015.2 | 875.5 | 724.3 | 547.3 |
| Total Pb (mg/kg)        | 382.2 | 266.0 | 252.2  | 320.8 | 276.1 | 186.0 | 381.8  | 264.1 | 261.5 | 302.9 |
| Total Zn (mg/kg)        | 100.9 | 107.8 | 131.8  | 140.4 | 116.3 | 93.2  | 215.6  | 116.7 | 118.8 | 88.0  |
| Exchangeable Cd (mg/kg) | ND    | ND    | ND     | ND    | ND    | ND    | ND     | ND    | ND    | ND    |
| Exchangeable Cu (mg/kg) | 4.0   | 5.9   | 1.0    | 1.2   | 2.1   | 2.3   | 2.1    | 2.3   | 2.3   | 5.0   |
| Exchangeable Pb (mg/kg) | 151.9 | 95.9  | 90.4   | 107.9 | 87.1  | 75.9  | 114.1  | 81.6  | 83.2  | 111.6 |
| Exchangeable Zn (mg/kg) | 18.2  | 5.5   | 16.7   | 16.2  | 10.7  | 10.4  | 14.8   | 5.3   | 20.7  | 8.6   |
| pH (H <sub>2</sub> O)   | 4.5   | 4.9   | 5.0    | 5.0   | 4.8   | 4.6   | 4.8    | 4.8   | 4.4   | 4.3   |

ND indicates that the concentration was below detection limit. The numbers from 1 to 10 indicate the replications of root-zone soil.

**(D) Data set for S2 Table: Cd, Cu, Mn, Pb, and Zn concentrations in *A. japonica* collected in July 2016.**

| Current-year leaves |       |       |       |       |       |       |
|---------------------|-------|-------|-------|-------|-------|-------|
| Element (mg/kg DW)  | 3     | 4     | 5     | 8     | 9     | 10    |
| Cd                  | ND    | ND    | ND    | ND    | ND    | ND    |
| Cu                  | 9.4   | 12.8  | 10.4  | 10.3  | 7.4   | 9.4   |
| Mn                  | 478.4 | 344.7 | 837.2 | 352.9 | 755.9 | 556.8 |
| Pb                  | ND    | ND    | ND    | ND    | ND    | ND    |
| Zn                  | 41.4  | 28.7  | 30.9  | 20.7  | 29.2  | 30.3  |

  

| 1-year-old leaves  |        |       |        |       |        |        |
|--------------------|--------|-------|--------|-------|--------|--------|
| Element (mg/kg DW) | 3      | 4     | 5      | 8     | 9      | 10     |
| Cd                 | ND     | ND    | ND     | ND    | ND     | ND     |
| Cu                 | 4.7    | 7.8   | 7.5    | 17.9  | 6.3    | 5.0    |
| Mn                 | 1481.8 | 934.0 | 1385.0 | 544.7 | 2123.7 | 1447.8 |
| Pb                 | ND     | ND    | ND     | ND    | ND     | ND     |
| Zn                 | 35.1   | 28.8  | 34.2   | 22.6  | 25.7   | 47.1   |

  

| Branches           |       |       |       |       |       |       |       |       |       |       |
|--------------------|-------|-------|-------|-------|-------|-------|-------|-------|-------|-------|
| Element (mg/kg DW) | 1     | 2     | 3     | 4     | 5     | 6     | 7     | 8     | 9     | 10    |
| Cd                 | ND    | ND    | ND    | ND    | ND    | ND    | ND    | ND    | ND    | ND    |
| Cu                 | 220.9 | 19.2  | 16.1  | 54.1  | 19.1  | 30.9  | 28.6  | 21.9  | 76.7  | 25.1  |
| Mn                 | 449.3 | 337.2 | 262.2 | 176.0 | 338.8 | 407.3 | 381.6 | 224.2 | 486.7 | 437.1 |
| Pb                 | ND    | ND    | ND    | ND    | ND    | ND    | ND    | ND    | ND    | ND    |
| Zn                 | 72.8  | 57.0  | 52.9  | 27.2  | 30.1  | 51.3  | 40.3  | 48.7  | 64.8  | 98.8  |

  

| Roots              |       |       |       |        |        |       |       |       |       |       |
|--------------------|-------|-------|-------|--------|--------|-------|-------|-------|-------|-------|
| Element (mg/kg DW) | 1     | 2     | 3     | 4      | 5      | 6     | 7     | 8     | 9     | 10    |
| Cd                 | 36.1  | 23.2  | 6.8   | 33.3   | 51.9   | 24.1  | 27.5  | 21.1  | 42.4  | 29.3  |
| Cu                 | 53.8  | 53.5  | 59.9  | 62.6   | 91.1   | 56.9  | 104.1 | 113.2 | 78.1  | 69.7  |
| Mn                 | 251.0 | 240.1 | 162.7 | 206.1  | 182.1  | 124.7 | 255.7 | 167.1 | 322.9 | 133.9 |
| Pb                 | 228.6 | 202.4 | 16.5  | 129.2  | 500.0  | 190.5 | 341.2 | 127.7 | 182.2 | 284.8 |
| Zn                 | 722.3 | 577.2 | 453.6 | 1230.2 | 1101.9 | 586.9 | 630.5 | 799.3 | 908.3 | 349.2 |

ND indicates that the concentration was below detection limit. The numbers from 1 to 10 indicate the replications of *A. japonica*.

**(E) Data set for S2 Table: Cd, Cu, Mn, Pb, and Zn concentrations in *A. japonica* collected in January 2017.**

Current-year leaves

| Element (mg/kg DW) | 3     | 4     | 5     | 8     | 9      | 10    |
|--------------------|-------|-------|-------|-------|--------|-------|
| Cd                 | ND    | ND    | ND    | ND    | ND     | ND    |
| Cu                 | 9.7   | 16.1  | 15.8  | 39.4  | 18.2   | 11.6  |
| Mn                 | 870.3 | 439.8 | 829.9 | 408.8 | 1616.8 | 873.3 |
| Pb                 | ND    | ND    | ND    | ND    | ND     | ND    |
| Zn                 | 21.8  | 20.0  | 14.3  | 38.1  | 21.9   | 30.1  |

1-year-old leaves

| Element (mg/kg DW) | 3      | 4     | 5      | 8     | 9      | 10     |
|--------------------|--------|-------|--------|-------|--------|--------|
| Cd                 | ND     | ND    | ND     | ND    | ND     | ND     |
| Cu                 | 4.6    | 15.2  | 24.1   | 16.4  | 6.0    | 11.4   |
| Mn                 | 1355.2 | 635.3 | 1386.4 | 651.0 | 2827.8 | 1214.1 |
| Pb                 | ND     | ND    | ND     | ND    | ND     | ND     |
| Zn                 | 33.7   | 11.6  | 13.6   | 21.1  | 16.7   | 22.0   |

Branches

| Element (mg/kg DW) | 1     | 2     | 3     | 4     | 5     | 6     | 7     | 8     | 9     | 10    |
|--------------------|-------|-------|-------|-------|-------|-------|-------|-------|-------|-------|
| Cd                 | ND    | ND    | ND    | ND    | ND    | ND    | ND    | ND    | ND    | ND    |
| Cu                 | 17.4  | 9.6   | 29.2  | 18.9  | 15.9  | 14.5  | 23.1  | 14.6  | 15.3  | 36.0  |
| Mn                 | 536.7 | 413.2 | 436.1 | 301.0 | 449.8 | 269.6 | 394.1 | 282.7 | 441.4 | 454.1 |
| Pb                 | 4.5   | 6.6   | 2.4   | 4.6   | 2.7   | 3.0   | 2.6   | 2.5   | 9.3   | 3.0   |
| Zn                 | 38.4  | 50.4  | 113.0 | 22.8  | 44.0  | 9.1   | 42.7  | 116.7 | 45.2  | 16.0  |

Roots

| Element (mg/kg DW) | 1     | 2     | 3      | 4      | 5      | 6     | 7     | 8     | 9     | 10    |
|--------------------|-------|-------|--------|--------|--------|-------|-------|-------|-------|-------|
| Cd                 | 34.8  | 31.8  | 35.2   | 51.3   | 37.9   | 52.8  | 42.6  | 24.8  | 33.3  | 40.1  |
| Cu                 | 93.9  | 57.5  | 36.6   | 82.5   | 69.0   | 84.3  | 60.0  | 159.7 | 99.1  | 94.9  |
| Mn                 | 342.7 | 357.6 | 209.1  | 133.2  | 382.8  | 266.6 | 343.4 | 163.7 | 352.6 | 375.8 |
| Pb                 | 143.9 | 320.7 | 32.7   | 425.4  | 282.8  | 495.3 | 465.4 | 202.9 | 167.3 | 843.6 |
| Zn                 | 682.7 | 716.4 | 1074.1 | 1319.4 | 1114.2 | 972.5 | 897.9 | 680.5 | 849.6 | 836.7 |

ND indicates that the concentration was below detection limit. The numbers from 1 to 10 indicate the replications of *A. japonica*.

**(F) Data set for S2 Table: Cd, Cu, Mn, Pb, and Zn concentrations in *A. japonica* collected in July 2017.**

Current-year leaves

| Element (mg/kg DW) | 1     | 2     | 3     | 4     | 5     | 6     | 7     | 8     | 9     | 10    |
|--------------------|-------|-------|-------|-------|-------|-------|-------|-------|-------|-------|
| Cd                 | ND    | ND    | ND    | ND    | ND    | ND    | ND    | ND    | ND    | ND    |
| Cu                 | 6.8   | 10.8  | 12.9  | 10.1  | 7.4   | 10.2  | 8.0   | 7.7   | 8.5   | 7.6   |
| Mn                 | 512.0 | 375.9 | 376.7 | 483.7 | 291.6 | 452.4 | 338.7 | 711.0 | 549.5 | 509.5 |
| Pb                 | ND    | ND    | ND    | ND    | ND    | ND    | ND    | ND    | ND    | ND    |
| Zn                 | 32.8  | 30.6  | 32.0  | 37.0  | 23.7  | 40.3  | 33.3  | 34.0  | 29.1  | 28.4  |

1-year-old leaves

| Element (mg/kg DW) | 1      | 2      | 3     | 4      | 5      | 6     | 7     | 8      | 9     | 10     |
|--------------------|--------|--------|-------|--------|--------|-------|-------|--------|-------|--------|
| Cd                 | ND     | ND     | ND    | ND     | ND     | ND    | ND    | ND     | ND    | ND     |
| Cu                 | 6.0    | 7.0    | 8.8   | 8.1    | 9.3    | 8.1   | 6.2   | 8.5    | 6.5   | 8.6    |
| Mn                 | 1219.0 | 1416.8 | 985.9 | 1584.6 | 1268.2 | 883.5 | 992.8 | 2038.8 | 898.4 | 2133.3 |
| Pb                 | ND     | ND     | ND    | ND     | ND     | ND    | ND    | ND     | ND    | ND     |
| Zn                 | 28.7   | 24.9   | 30.1  | 39.0   | 30.3   | 27.1  | 37.1  | 35.1   | 35.1  | 40.3   |

Branches

| Element (mg/kg DW) | 1     | 2     | 3     | 4     | 5     | 6     | 7     | 8     | 9     | 10    |
|--------------------|-------|-------|-------|-------|-------|-------|-------|-------|-------|-------|
| Cd                 | ND    | ND    | ND    | ND    | ND    | ND    | ND    | ND    | ND    | ND    |
| Cu                 | 42.0  | 19.8  | 56.7  | 33.3  | 26.6  | 33.6  | 47.8  | 14.6  | 17.5  | 58.4  |
| Mn                 | 211.3 | 322.1 | 200.9 | 471.4 | 242.7 | 316.8 | 322.0 | 226.1 | 324.1 | 223.8 |
| Pb                 | ND    | ND    | ND    | ND    | ND    | ND    | ND    | ND    | ND    | ND    |
| Zn                 | 44.2  | 29.3  | 46.4  | 90.9  | 44.4  | 41.5  | 56.4  | 22.2  | 44.3  | 37.4  |

Roots

| Element (mg/kg DW) | 1     | 2     | 3     | 4     | 5     | 6     | 7     | 8      | 9     | 10    |
|--------------------|-------|-------|-------|-------|-------|-------|-------|--------|-------|-------|
| Cd                 | 27.0  | 25.1  | 24.2  | 38.2  | 14.3  | 11.5  | 20.4  | 55.8   | 16.4  | 22.3  |
| Cu                 | 52.7  | 99.3  | 53.7  | 165.4 | 96.3  | 153.6 | 86.8  | 151.9  | 81.3  | 65.1  |
| Mn                 | 250.1 | 185.9 | 196.0 | 87.4  | 72.4  | 68.4  | 400.7 | 266.9  | 237.8 | 97.1  |
| Pb                 | 312.7 | 221.0 | 147.9 | 863.0 | 48.2  | 112.5 | 221.8 | 186.4  | 27.0  | 311.6 |
| Zn                 | 931.1 | 796.5 | 701.6 | 738.2 | 338.9 | 364.1 | 835.4 | 1015.9 | 613.9 | 363.8 |

ND indicates that the concentration was below detection limit. The numbers from 1 to 10 indicate the replications of *A. japonica*.

**(G) Data set for S2 Table: Cd, Cu, Mn, Pb, and Zn concentrations in *A. japonica* collected in January 2018.**

| Current-year leaves |       |       |       |       |       |       |       |       |       |       |
|---------------------|-------|-------|-------|-------|-------|-------|-------|-------|-------|-------|
| Element (mg/kg DW)  | 1     | 2     | 3     | 4     | 5     | 6     | 7     | 8     | 9     | 10    |
| Cd                  | ND    | ND    | ND    | ND    | ND    | ND    | ND    | ND    | ND    | ND    |
| Cu                  | 8.2   | 6.5   | 8.1   | 6.3   | 7.9   | 8.2   | 16.4  | 15.0  | 6.6   | 10.5  |
| Mn                  | 734.4 | 534.2 | 686.4 | 497.2 | 742.0 | 514.1 | 650.3 | 778.6 | 383.1 | 791.7 |
| Pb                  | ND    | ND    | ND    | ND    | ND    | ND    | ND    | ND    | ND    | ND    |
| Zn                  | 29.0  | 19.3  | 21.8  | 21.3  | 36.1  | 23.7  | 26.1  | 25.0  | 17.6  | 20.1  |

  

| 1-year-old leaves  |        |       |       |       |        |       |       |        |       |        |
|--------------------|--------|-------|-------|-------|--------|-------|-------|--------|-------|--------|
| Element (mg/kg DW) | 1      | 2     | 3     | 4     | 5      | 6     | 7     | 8      | 9     | 10     |
| Cd                 | ND     | ND    | ND    | ND    | ND     | ND    | ND    | ND     | ND    | ND     |
| Cu                 | 6.8    | 7.2   | 14.3  | 6.7   | 7.4    | 9.4   | 7.2   | 6.7    | 8.4   | 13.7   |
| Mn                 | 1225.3 | 767.2 | 927.0 | 791.6 | 1170.3 | 685.7 | 870.8 | 1191.4 | 690.0 | 1581.2 |
| Pb                 | ND     | ND    | ND    | ND    | ND     | ND    | ND    | ND     | ND    | ND     |
| Zn                 | 30.8   | 18.8  | 21.1  | 37.1  | 29.6   | 31.3  | 28.8  | 31.1   | 26.6  | 28.5   |

  

| Branches           |       |       |       |       |       |       |       |       |       |       |
|--------------------|-------|-------|-------|-------|-------|-------|-------|-------|-------|-------|
| Element (mg/kg DW) | 1     | 2     | 3     | 4     | 5     | 6     | 7     | 8     | 9     | 10    |
| Cd                 | ND    | ND    | ND    | ND    | ND    | ND    | ND    | ND    | ND    | ND    |
| Cu                 | 18.2  | 16.0  | 15.8  | 17.6  | 23.5  | 14.0  | 29.9  | 19.6  | 19.4  | 17.5  |
| Mn                 | 237.7 | 168.6 | 235.6 | 251.2 | 299.8 | 216.8 | 210.6 | 243.0 | 184.4 | 398.1 |
| Pb                 | ND    | ND    | ND    | ND    | ND    | ND    | ND    | ND    | ND    | ND    |
| Zn                 | 30.6  | 21.2  | 17.2  | 50.6  | 21.9  | 51.5  | 34.9  | 66.5  | 48.1  | 58.2  |

  

| Roots              |       |       |       |        |       |       |       |       |        |       |
|--------------------|-------|-------|-------|--------|-------|-------|-------|-------|--------|-------|
| Element (mg/kg DW) | 1     | 2     | 3     | 4      | 5     | 6     | 7     | 8     | 9      | 10    |
| Cd                 | 25.8  | 13.8  | 16.0  | 60.0   | 20.6  | 19.9  | 22.8  | 48.1  | 38.8   | 14.2  |
| Cu                 | 69.2  | 49.0  | 51.0  | 134.2  | 66.3  | 120.4 | 125.0 | 109.7 | 78.8   | 82.1  |
| Mn                 | 140.1 | 96.0  | 117.9 | 182.4  | 162.0 | 93.2  | 186.0 | 141.7 | 232.8  | 106.8 |
| Pb                 | 126.1 | 91.4  | 50.1  | 410.8  | 160.6 | 146.9 | 315.4 | 162.4 | 182.8  | 54.6  |
| Zn                 | 752.9 | 449.9 | 621.5 | 1735.7 | 384.4 | 561.4 | 733.2 | 755.0 | 1185.1 | 340.0 |

ND indicates that the concentration was below detection limit. The numbers from 1 to 10 indicate the replications of *A. japonica*.

**(H) Data set for S3 Table: Cd, Cu, Mn, Pb, and Zn concentrations in current-year *A. japonica* seedlings.**

| Leaves             |       |      |        |      |       |
|--------------------|-------|------|--------|------|-------|
| Element (mg/kg DW) | 1     | 2    | 3      | 4    | 5     |
| Cd                 | ND    | ND   | ND     | ND   | ND    |
| Cu                 | 11.5  | 13.2 | 12.9   | 17.1 | 13.9  |
| Mn                 | 124.2 | 70.6 | 1038.5 | 75.5 | 122.8 |
| Pb                 | ND    | ND   | ND     | ND   | ND    |
| Zn                 | 37.4  | 55.1 | 71.3   | 34.5 | 31.6  |

| Cotyledons         |       |       |        |       |       |
|--------------------|-------|-------|--------|-------|-------|
| Element (mg/kg DW) | 1     | 2     | 3      | 4     | 5     |
| Cd                 | ND    | ND    | ND     | ND    | ND    |
| Cu                 | ND    | ND    | ND     | ND    | ND    |
| Mn                 | 525.1 | 180.1 | 1954.8 | 190.6 | 358.0 |
| Pb                 | ND    | ND    | ND     | ND    | ND    |
| Zn                 | 38.5  | 43.4  | 36.7   | 28.6  | 27.1  |

| Hypocotyls         |      |      |       |      |      |
|--------------------|------|------|-------|------|------|
| Element (mg/kg DW) | 1    | 2    | 3     | 4    | 5    |
| Cd                 | ND   | ND   | ND    | ND   | ND   |
| Cu                 | ND   | ND   | ND    | ND   | ND   |
| Mn                 | 73.1 | 39.6 | 311.4 | 49.8 | 74.3 |
| Pb                 | ND   | ND   | ND    | ND   | ND   |
| Zn                 | 63.6 | 31.0 | 51.4  | 26.5 | 31.7 |

| Roots              |       |       |       |       |       |
|--------------------|-------|-------|-------|-------|-------|
| Element (mg/kg DW) | 1     | 2     | 3     | 4     | 5     |
| Cd                 | ND    | ND    | ND    | ND    | ND    |
| Cu                 | 54.8  | 21.7  | 52.3  | 23.7  | 19.8  |
| Mn                 | 56.4  | 75.2  | 76.5  | 562.1 | 62.1  |
| Pb                 | 100.5 | 35.1  | 57.5  | 61.2  | 83.2  |
| Zn                 | 140.6 | 161.5 | 151.2 | 220.5 | 161.1 |

ND indicates that the concentration was below detection limit. The numbers from 1 to 5 indicate the replications of *A. japonica* seedlings.



**(I) Data set for S2 Fig.: Net photosynthetic rates in *A. japonica***

July 2017

| PFD ( $\mu\text{mol m}^{-2}\text{s}^{-1}$ ) | Net photosynthetic rates ( $\mu\text{mol m}^{-2}\text{s}^{-1}$ ) |       |       |       |       |       |       |       |       |       |
|---------------------------------------------|------------------------------------------------------------------|-------|-------|-------|-------|-------|-------|-------|-------|-------|
|                                             | 1                                                                | 2     | 3     | 4     | 5     | 6     | 7     | 8     | 9     | 10    |
| 1500                                        | 3.76                                                             | 4.20  | 4.51  | 3.99  | 4.15  | 5.07  | 6.26  | 5.08  | 4.72  | 4.83  |
| 1000                                        | 3.53                                                             | 4.32  | 4.66  | 3.41  | 3.68  | 4.89  | 6.66  | 6.00  | 5.22  | 5.41  |
| 750                                         | 4.01                                                             | 4.37  | 4.96  | 3.97  | 3.90  | 4.86  | 7.29  | 6.29  | 4.69  | 4.68  |
| 500                                         | 3.81                                                             | 3.85  | 4.59  | 3.49  | 3.89  | 4.58  | 7.30  | 5.81  | 4.75  | 3.99  |
| 300                                         | 3.43                                                             | 3.77  | 4.32  | 3.45  | 4.28  | 5.04  | 6.80  | 5.65  | 4.35  | 4.33  |
| 200                                         | 3.36                                                             | 3.98  | 4.12  | 3.42  | 3.75  | 4.12  | 5.96  | 5.32  | 4.14  | 4.31  |
| 100                                         | 2.62                                                             | 3.09  | 3.46  | 3.16  | 3.28  | 3.02  | 4.38  | 3.98  | 3.63  | 3.92  |
| 50                                          | 1.80                                                             | 1.99  | 1.82  | 2.25  | 2.28  | 1.70  | 2.30  | 2.37  | 2.20  | 2.55  |
| 30                                          | 1.29                                                             | 1.33  | 1.49  | 1.35  | 1.38  | 1.68  | 1.34  | 1.60  | 1.32  | 1.67  |
| 15                                          | 0.14                                                             | 0.96  | 0.43  | 0.19  | 0.80  | 0.65  | 0.50  | 0.96  | 0.35  | 0.72  |
| 8                                           | -0.06                                                            | 0.07  | -0.08 | 0.02  | 0.21  | -0.12 | -0.20 | 0.11  | 0.01  | -0.44 |
| 0                                           | -0.15                                                            | -0.16 | -0.46 | -0.28 | -0.14 | -0.28 | -0.70 | -0.35 | -0.62 | -0.67 |

December 2017-February 2018

| PFD ( $\mu\text{mol m}^{-2}\text{s}^{-1}$ ) | Net photosynthetic rates ( $\mu\text{mol m}^{-2}\text{s}^{-1}$ ) |       |       |       |       |       |       |       |       |       |
|---------------------------------------------|------------------------------------------------------------------|-------|-------|-------|-------|-------|-------|-------|-------|-------|
|                                             | 1                                                                | 2     | 3     | 4     | 5     | 6     | 7     | 8     | 9     | 10    |
| 1500                                        | 3.11                                                             | 3.32  | 5.45  | 4.56  | 5.08  | 5.41  | 4.55  | 3.93  | 4.44  | 5.22  |
| 1000                                        | 2.61                                                             | 3.52  | 5.43  | 4.18  | 5.51  | 5.13  | 4.83  | 4.20  | 4.07  | 5.94  |
| 750                                         | 2.77                                                             | 3.08  | 5.42  | 3.26  | 5.12  | 5.05  | 4.79  | 4.02  | 3.31  | 5.31  |
| 500                                         | 2.29                                                             | 2.92  | 4.74  | 3.96  | 4.19  | 4.83  | 4.93  | 4.51  | 3.58  | 4.78  |
| 300                                         | 2.66                                                             | 2.58  | 4.29  | 3.54  | 4.29  | 4.39  | 3.76  | 3.27  | 3.51  | 4.33  |
| 200                                         | 1.47                                                             | 2.84  | 3.81  | 3.04  | 3.93  | 3.92  | 4.32  | 2.47  | 3.32  | 3.48  |
| 100                                         | 0.63                                                             | 1.33  | 3.01  | 2.90  | 3.49  | 2.34  | 2.30  | 2.18  | 2.93  | 4.44  |
| 50                                          | 0.85                                                             | 0.89  | 1.88  | 2.10  | 1.62  | 1.30  | 1.39  | 0.56  | 1.88  | 2.76  |
| 30                                          | 0.37                                                             | 0.35  | 1.14  | 1.71  | 1.59  | 0.30  | 1.08  | 0.47  | 1.20  | 1.34  |
| 15                                          | 0.32                                                             | 0.48  | 0.82  | 1.02  | 1.17  | 0.04  | 0.33  | 0.01  | 1.15  | 0.61  |
| 8                                           | 0.17                                                             | 0.16  | 0.12  | 0.30  | 0.35  | -0.23 | 0.23  | -0.25 | 0.30  | 0.28  |
| 0                                           | -0.29                                                            | -0.29 | -0.20 | -0.34 | -0.24 | -0.54 | -0.60 | -0.88 | -0.38 | -0.16 |

The numbers from 1 to 10 indicate the replications of *A. japonica*.

**(J) Data set for S3 Fig.: Growth rate of annual branch in *A. japonica*.**

| Replications | Length (mm) |      |       |      |      |      |      |      |      |      |
|--------------|-------------|------|-------|------|------|------|------|------|------|------|
|              | July        | Aug. | Sept. | Oct. | Nov. | Dec. | Jan. | Mar. | Apr. | May  |
| 1            | 1.0         | 0.0  | 0.0   | 0.1  | 0.4  | 0.2  | 0.1  | 0.0  | 12.1 | 7.9  |
| 2            | 1.2         | 0.5  | 0.6   | 0.2  | 0.0  | 0.1  | 0.2  | 0.0  | 12.7 | 10.4 |
| 3            | 1.4         | 0.2  | 0.0   | 0.2  | 0.2  | 0.2  | 0.2  | 0.0  | 15.9 | 8.3  |
| 4            | 0.5         | 0.0  | 0.0   | 0.3  | 0.4  | 0.3  | 0.2  | 0.0  | 10.3 | 9.5  |
| 5            | 4.5         | 0.2  | 0.2   | 0.5  | 0.3  | 0.3  | 0.1  | 0.0  | 12.2 | 7.3  |
| 6            | 1.0         | 0.0  | 0.5   | 0.7  | 0.2  | 0.3  | 0.0  | 0.0  | 5.4  | 5.4  |
| 7            | 0.5         | 0.5  | 0.7   | 0.2  | 0.3  | 0.0  | 0.1  | 0.3  | 9.8  | 6.9  |
| 8            | 0.2         | 0.8  | 0.5   | 0.0  | 0.0  | 0.2  | 0.2  | 0.0  | 15.6 | 16.3 |
| 9            | 1.0         | 0.0  | 2.0   | 0.0  | 0.7  | 0.0  | 0.3  | 0.0  | 5.8  | 4.1  |
| 10           | 3.0         | 0.4  | 0.0   | 0.4  | 0.2  | 0.2  | 0.0  | 0.0  | 17.1 | 15.8 |

The numbers from 1 to 10 indicate the replications of *A. japonica*.
