# Supplementary material for: Zn tolerance in the evergreen shrub, Aucuba japonica, naturally growing at a mine site: Cell wall immobilization, aucubin production, and Zn adsorption on fungal mycelia
Source: PubMed Central journal article supplement (PMC8483361; doi:10.1371/journal.pone.0257690), 2021-09-30
Supplement: pone.0257690.s003.pdf [file pone.0257690.s003.pdf]

|                                           | July 2016<br>(summer) | January 2017<br>(winter) | July 2017<br>(summer) | January 2018<br>(winter) |
|-------------------------------------------|-----------------------|--------------------------|-----------------------|--------------------------|
| <b>Heavy metal concentration analysis</b> | █                     | █                        | █                     | █                        |
| <b>Microbial observation</b>              | █                     | █                        | □                     | □                        |
| <b>Detoxicant analysis</b>                | □                     | □                        | █                     | █                        |
| <b>Zn localization observation</b>        | □                     | □                        | █                     | █                        |
