# Supplementary material for: Zn tolerance in the evergreen shrub, Aucuba japonica, naturally growing at a mine site: Cell wall immobilization, aucubin production, and Zn adsorption on fungal mycelia
Source: PubMed Central journal article supplement (PMC8483361; doi:10.1371/journal.pone.0257690), 2021-09-30
Supplement: pone.0257690.s006.pdf [file pone.0257690.s006.pdf]

| <b>Properties</b>                       | <b>Value</b>   |
|-----------------------------------------|----------------|
| Total Cd (mg/kg)                        | 3.2 ± 0.1      |
| Total Cu (mg/kg)                        | 345.60 ± 12.7  |
| Total Mn (mg/kg)                        | 903.40 ± 158.4 |
| Total Pb (mg/kg)                        | 289.40 ± 19    |
| Total Zn (mg/kg)                        | 122.90 ± 11.5  |
| Exchangeable Cd (mg/kg)                 | ND             |
| Exchangeable Cu (mg/kg)                 | 2.8 ± 0.5      |
| Exchangeable Pb (mg/kg)                 | 100.0 ± 0.1    |
| Exchangeable Zn (mg/kg)                 | 12.7 ± 1.7     |
| pH (H <sub>2</sub> O)                   | 4.7 ± 0.1      |
| Cation exchange capacity [cmol (+) /kg] | 46.7           |
| Organic C (%)                           | 12.9           |
| Total N (%)                             | 0.8            |
