# Supplementary material for: Zn tolerance in the evergreen shrub, Aucuba japonica, naturally growing at a mine site: Cell wall immobilization, aucubin production, and Zn adsorption on fungal mycelia
Source: PubMed Central journal article supplement (PMC8483361; doi:10.1371/journal.pone.0257690), 2021-09-30
Supplement: pone.0257690.s007.pdf [file pone.0257690.s007.pdf]

| Element (mg/kg DW)      | July 2016<br>(summer) | January 2017<br>(winter) | <i>P</i> value | July 2017<br>(summer) | January 2018<br>(winter) | <i>P</i> value |
|-------------------------|-----------------------|--------------------------|----------------|-----------------------|--------------------------|----------------|
| (a) Current-year leaves |                       |                          |                |                       |                          |                |
| Cd                      | ND                    | ND                       |                | ND                    | ND                       |                |
| Cu                      | 9.9±0.7               | 18.5±4.4*                | 0.028          | 9.0±0.6               | 9.4±1.1                  | 0.959          |
| Mn                      | 554.3±83.9            | 839.8±178.1*             | 0.046          | 460.1±38.6            | 631.2±44.3*              | 0.022          |
| Pb                      | ND                    | ND                       |                | ND                    | ND                       |                |
| Zn                      | 30.2±2.7              | 24.4±3.4                 | 0.249          | 32.1±1.5              | 24.0±1.7                 | 0.249          |
| (b) 1-year-old leaves   |                       |                          |                |                       |                          |                |
| Cd                      | ND                    | ND                       |                | ND                    | ND                       |                |
| Cu                      | 8.2±2.0               | 12.9±3.0                 | 0.116          | 7.7±0.4               | 8.8±0.9                  | 0.386          |
| Mn                      | 1319.5±219.3          | 1345.0±326.7             | 0.753          | 1342.1±143.5**        | 990.1±92.4               | 0.007          |
| Pb                      | ND                    | ND                       |                | ND                    | ND                       |                |
| Zn                      | 32.2±3.6*             | 19.8±3.2                 | 0.028          | 32.8±1.7*             | 28.4±1.7                 | 0.047          |
| (c) Branches            |                       |                          |                |                       |                          |                |
| Cd                      | ND                    | ND                       |                | ND                    | ND                       |                |
| Cu                      | 51.2±19.8             | 19.5±2.5                 | 0.093          | 35.0±5.0*             | 19.1±1.4                 | 0.022          |
| Mn                      | 350.0±32.4            | 397.9±27.5               | 0.114          | 286.1±26.1            | 244.6±20.6               | 0.386          |
| Pb                      | ND                    | 4.2±0.7                  |                | ND                    | ND                       |                |
| Zn                      | 54.4±6.7              | 49.8±11.7                | 0.575          | 45.7±5.8              | 40.1±5.4                 | 0.445          |
| (d) Roots               |                       |                          |                |                       |                          |                |
| Cd                      | 29.6±3.9              | 38.5±2.7                 | 0.093          | 25.5±4.1              | 28.0±5.0                 | 0.721          |
| Cu                      | 74.3±6.8              | 83.8±10.5                | 0.333          | 100.6±13.3            | 88.6±9.9                 | 0.203          |
| Mn                      | 204.6±19.7            | 292.8±29.4*              | 0.022          | 186.3±34.0            | 145.9±14.3               | 0.285          |
| Pb                      | 220.3±41.9            | 338.0±73.5               | 0.114          | 245.2±75.2            | 170.1±35.9               | 0.285          |
| Zn                      | 735.9±88.2            | 914.4±65.9               | 0.074          | 669.9±77.2            | 751.9±133.5              | 0.959          |
