# Supplementary material for: Zn tolerance in the evergreen shrub, Aucuba japonica, naturally growing at a mine site: Cell wall immobilization, aucubin production, and Zn adsorption on fungal mycelia
Source: PubMed Central journal article supplement (PMC8483361; doi:10.1371/journal.pone.0257690), 2021-09-30
Supplement: pone.0257690.s008.pdf [file pone.0257690.s008.pdf]

| <b>Element (mg/kg DW)</b> | <b>Leaves</b> | <b>Cotyledons</b> | <b>Hypocotyls</b> | <b>Roots</b> |
|---------------------------|---------------|-------------------|-------------------|--------------|
| Cd                        | ND            | ND                | ND                | ND           |
| Cu                        | 13.7±0.9      | ND                | ND                | 34.5±7.8     |
| Mn                        | 286.3±188.4   | 641.7±334.2       | 109.6±50.9        | 166.5±99.0   |
| Pb                        | ND            | ND                | ND                | 67.5±11.2    |
| Zn                        | 46.0±7.5      | 34.9±3.1          | 40.9±7.1          | 167.0±13.9   |
